# Supplementary material for: 1H-Detected quadrupolar spin–lattice relaxation measurements under magic-angle spinning solid-state NMR
Source: Royal Society of Chemistry journal article supplement (doi:10.1039/c9cc01176e), 2019-01-01
Supplement: c9cc01176e1.pdf [file c9cc01176e1.pdf]

SUPPORTING INFORMATION

# <sup>1</sup>H-Detected quadrupolar spin-lattice relaxation measurements under magic-angle spinning solid-state NMR

Maria Makrinich<sup>a</sup>, Amir Goldbourt<sup>a,\*</sup>

<sup>a</sup>School of Chemistry, Sackler Faculty of Exact Sciences, Tel Aviv University, Ramat Aviv 6997801, Tel Aviv, Israel.  
\*amirgo@tauex.tau.ac.il

## 1. Experimental parameters

| Variable                                            | <sup>23</sup> Na indirect<br>Fig. 1c                        | <sup>23</sup> Na direct<br>Fig. 1b                          | <sup>14</sup> N indirect<br>Fig. 2a | <sup>81</sup> Br indirect<br>Fig. 2b                  |
|-----------------------------------------------------|-------------------------------------------------------------|-------------------------------------------------------------|-------------------------------------|-------------------------------------------------------|
| Spectrometer details: Field / Console / Probe       | 14.1 T / Bruker AVIII / 4mm                                 | 14.1 T / Bruker AVIII / 4mm                                 | 9.4 T / Bruker AVIII / 4mm          | 14.1 T / Bruker AVIII / 4mm                           |
| Material and source                                 | Na <sub>2</sub> HPO <sub>4</sub> ·2H <sub>2</sub> O (Merck) | Na <sub>2</sub> HPO <sub>4</sub> ·2H <sub>2</sub> O (Merck) | Glycine (Bio-Lab Chemicals)         | Tetra-n-butylammonium bromide (Chem-Impex Int'l Inc.) |
| Spinning speed                                      | 14 kHz                                                      | 14 kHz                                                      | 14 kHz                              | 14 kHz                                                |
| PM pulse power / length (τ <sub>PM</sub> )          | 33.5 kHz / 10 T <sub>R</sub>                                | 33.5 kHz / 10 T <sub>R</sub>                                | 30 kHz / 50 T <sub>R</sub>          | 40 kHz / 10 T <sub>R</sub>                            |
| *Excitation pulse power / length (τ <sub>p</sub> )  | 9.9 kHz / 12.6 μs                                           | 9.9 kHz / 12.6 μs                                           | 30 kHz / 41.5 μs                    | 51.5 kHz / 2.4 μs                                     |
| CP power <sup>1</sup> H / CP power X / pulse length | 39 kHz / 14.6 kHz / 1.5 ms                                  |                                                             | 29 kHz / 15 kHz / 2.4 ms            | 45 kHz / 8.5 kHz / 3.0 ms                             |
| <sup>1</sup> H decoupling                           |                                                             | 100 kHz, swf-tppm                                           |                                     |                                                       |
| Recycle delay                                       | 1 s                                                         | 1 s                                                         | 1.6 s                               | 1 s                                                   |
| Scans                                               | 32                                                          | 4                                                           | 512                                 | 8192                                                  |
| Total experimental time                             | 1.16 hrs                                                    | 8.7 min                                                     | 5.71 hrs                            | 63.4 hrs                                              |
| Temperature**                                       | ~45 °C                                                      | ~45 °C                                                      | 18.2 °C                             | ~45 °C                                                |
| Apodization                                         | Exponential, 100 Hz                                         | Exponential, 30 Hz                                          | Exponential, 200 Hz                 | Exponential, 500 Hz                                   |

**<sup>23</sup>Na experiments:** The <sup>1</sup>H-detected {<sup>23</sup>Na}<sup>1</sup>H CP experiment shown in the inset of Fig. 1c was conducted with 32 scans and all other experimental parameters were similar to Fig. 1c. The Bloch-decay <sup>1</sup>H spectrum was obtained using a 90° pulse of 100 kHz and a single scan. The <sup>1</sup>H T<sub>1</sub> value in this compound is ~7 min, hence a single scan was used for the Bloch-decay <sup>1</sup>H spectrum, and the measurement was performed after a long waiting period.

**<sup>14</sup>N experiments:** The <sup>1</sup>H-detected {<sup>14</sup>N}<sup>1</sup>H CP experiment in the inset of Fig. 2a was conducted with 128 scans, a recycle delay of 5 s, and the same experimental parameters as the saturation recovery experiment (Fig. 2a). The Bloch-decay <sup>1</sup>H spectrum was obtained using 90° pulse of 100 kHz, a recycle delay of 3 s, and a single scan.

**<sup>81</sup>Br experiments:** The <sup>1</sup>H-detected {<sup>81</sup>Br}<sup>1</sup>H CP experiment in the inset was conducted with the same experimental parameters used in the saturation recovery experiment. <sup>1</sup>H was saturated in the beginning of the sequence to avoid the presence of any residual signal from direct excitation. The Bloch-decay <sup>1</sup>H spectrum was obtained with a recycle delay of 35 s, and a single scan.

\* <sup>81</sup>Br power levels were calibrated using the signal of KBr. <sup>14</sup>N power levels were calibrated using NH<sub>4</sub>Cl.

\*\* The temperature in the experiments on <sup>23</sup>Na and <sup>81</sup>Br are the values of the temperature in the room (22 °C) corrected for frictional heating at a spinning speed of 14 kHz, as determined from experiments on PbNO<sub>3</sub> (approximately 23-25 °C). The temperatures in the experiments on <sup>14</sup>N were determined by the second sensor in the probe. Temperature dependent experiments on <sup>14</sup>N are detailed below (Figs. S2, S3) with their explicit experimental values.

> The lack of signal originating from direct excitation of the proton spins was verified by performing experiments without irradiation on the quadrupolar spins.

>>Phase cycle opt. 1: Quadrupolar excitation pulse:  $y, \bar{y}$ ; CP(<sup>1</sup>H):  $x, x, \bar{x}, \bar{x}, y, \bar{y}, y, \bar{y}$ ; CP(X):  $x$ ; receiver:  $x, \bar{x}, \bar{x}, x, y, \bar{y}, \bar{y}, y$ . (X=<sup>23</sup>Na, <sup>14</sup>N, <sup>81</sup>Br)

>>Phase cycle opt. 2: Quadrupolar excitation pulse:  $y, \bar{y}$ ; CP(<sup>1</sup>H):  $(x)_4, (\bar{x})_4, (y)_4, (\bar{y})_4$ ; CP(X):  $(x)_2, (\bar{x})_2$ ; receiver:  $x, \bar{x}, \bar{x}, x, \bar{x}, x, \bar{x}, y, \bar{y}, \bar{y}, y, \bar{y}, y, \bar{y}$ .

## SUPPORTING INFORMATION

### 2. Temperature dependent $^1\text{H}$ -detected $^{14}\text{N}$ PM-saturation recovery spin-lattice ( $T_1$ ) relaxation measurements in natural-abundance glycine.

Experimental variables different from the Table above are indicated explicitly.

The fit values were used to produce Figure 3 in the article.

Figs. S2.1-S2.5 were acquired with a long  $^{14}\text{N}$  excitation pulse  $\tau_p$ ; Figs. S2.6-S2.9 were acquired with a short excitation pulse.

All curves were fit using the MATLAB tool 'cftools'. The errors report a confidence level of 95%.

**Figure S2.1:** Temperature ( $T$ )=18.2 °C.  
The mono-exponential fit yields  $m = 0.99 \pm 0.03$ ;  $a = 1.07 \pm 0.03$ ;  $T_1 = 590 \pm 77$  ms.  
 $\tau_{\text{PM}} = 30$  TR;  $\tau_p=41.5$   $\mu\text{s}$ . Total experimental time ( $t_{\text{exp}}$ ) = 5.71 hrs.

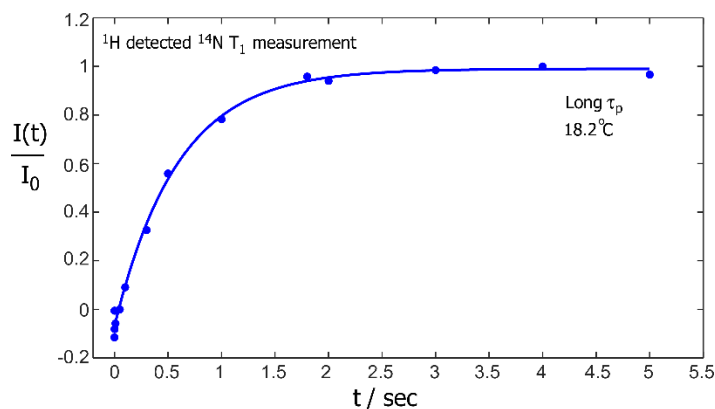

**Figure S2.2:**  $T=18.1$  °C.  
The mono-exponential fit yields  $m = 0.98 \pm 0.03$ ;  $a = 1.08 \pm 0.03$ ;  $T_1 = 648 \pm 74$  ms.  
 $\tau_p=48$   $\mu\text{s}$ ; CP power  $^1\text{H}$ : 29.8 kHz, power  $^{14}\text{N}$  15 kHz, length 3ms.  $t_{\text{exp}} = 5.71$  hrs.

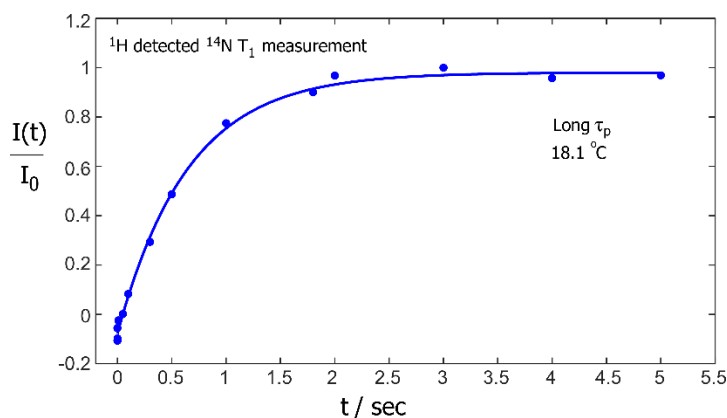

SUPPORTING INFORMATION

**Figure S2.3:** T=-28.3 °C.

The mono-exponential fit yields  $m = 0.98 \pm 0.02$  ;  $a = 1.01 \pm 0.03$  ;  $T_1 = 255 \pm 25$  ms.  
 $\tau_p = 48 \mu\text{s}$ ; recycle delay = 9.6 s.  $t_{\text{exp}} = 21.63$  hrs.

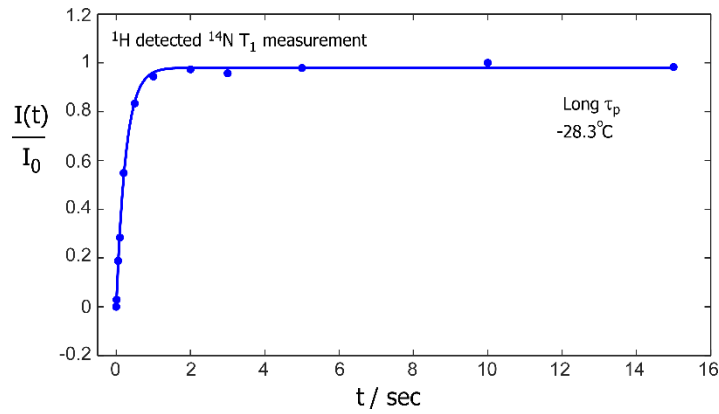

**Figure S2.4:** T = 47.2 °C.

Fit:  $m = 0.97 \pm 0.04$  ;  $a = 1.07 \pm 0.05$  ;  $T_1 = 839 \pm 143$  ms.  
 $\tau_p = 48 \mu\text{s}$ ; recycle delay = 1.3 s; 1024 scans.  $t_{\text{exp}} = 11.85$  hrs.

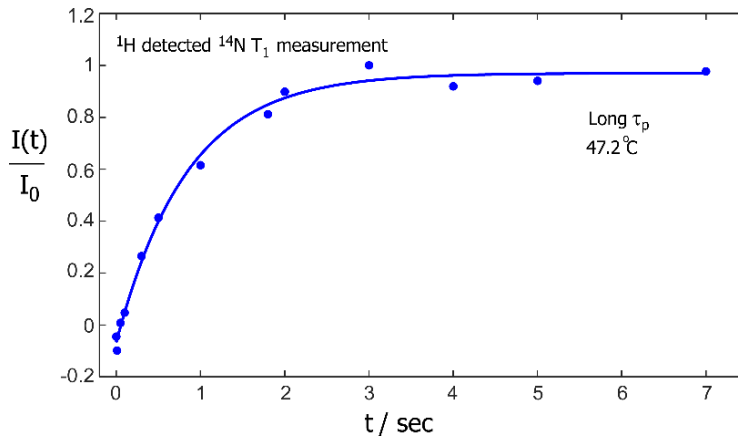

**Figure S2.5:** T = -3.8 °C.

Fit:  $m = 0.98 \pm 0.03$  ;  $a = 1.01 \pm 0.04$  ;  $T_1 = 349 \pm 51$  ms.  
 $\tau_p = 48 \mu\text{s}$ ; recycle delay = 3.2 s.  $t_{\text{exp}} = 6.82$  hrs.

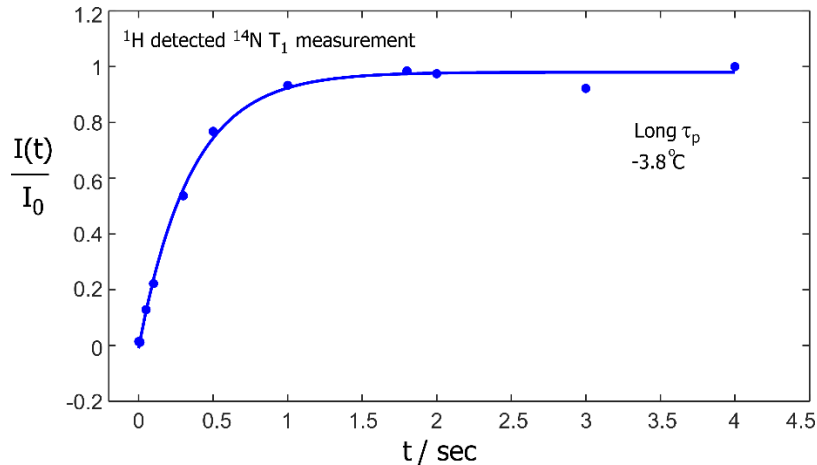

## SUPPORTING INFORMATION

**Figure S2.6:**  $T = -3.9\text{ }^{\circ}\text{C}$ .

Fit:  $m = 0.99 \pm 0.05$ ;  $a = 1.15 \pm 0.06$ ;  $T_1 = 449 \pm 82\text{ ms}$ .

$\tau_p = 8.3\text{ }\mu\text{s}$ ; recycle delay = 3.2 s; 1280 scans.  $t_{\text{exp}} = 17.05\text{ hrs}$ .

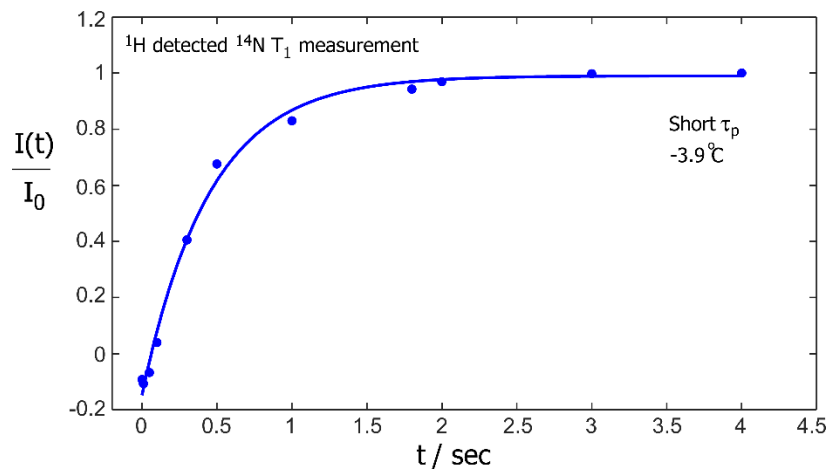

**Figure S2.7:**  $T = 18.3\text{ }^{\circ}\text{C}$ .

Fit:  $m = 1.00 \pm 0.03$ ;  $a = 1.01 \pm 0.03$ ;  $T_1 = 517 \pm 64\text{ ms}$ .

$\tau_p = 8.3\text{ }\mu\text{s}$ ; recycle delay = 1.6 s; 2048 scans.  $t_{\text{exp}} = 17.16\text{ hrs}$ .

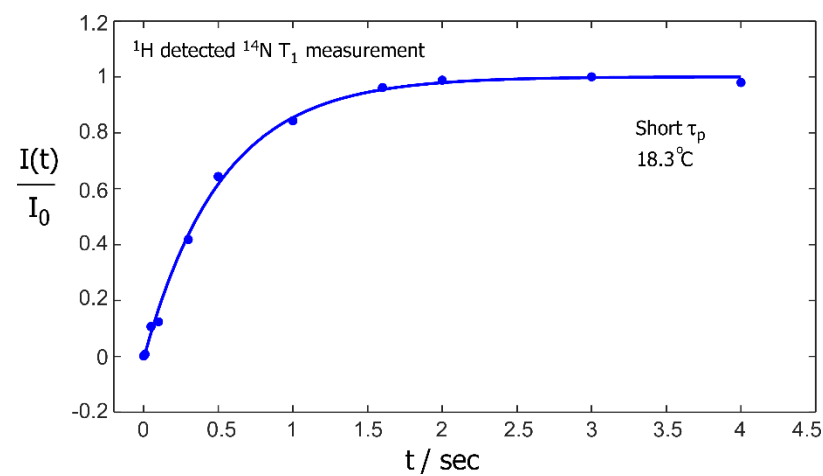

## SUPPORTING INFORMATION

**Figure S2.8:**  $T = 47.3\text{ }^{\circ}\text{C}$ .  
Fit:  $m = 0.99 \pm 0.06$ ;  $a = 1.27 \pm 0.06$ ;  $T_1 = 862 \pm 160\text{ ms}$ .  
 $\tau_p = 8.3\text{ }\mu\text{s}$ ; recycle delay = 1.3 s; 2048 scans.  $t_{\text{exp}} = 18.86\text{ hrs}$ .

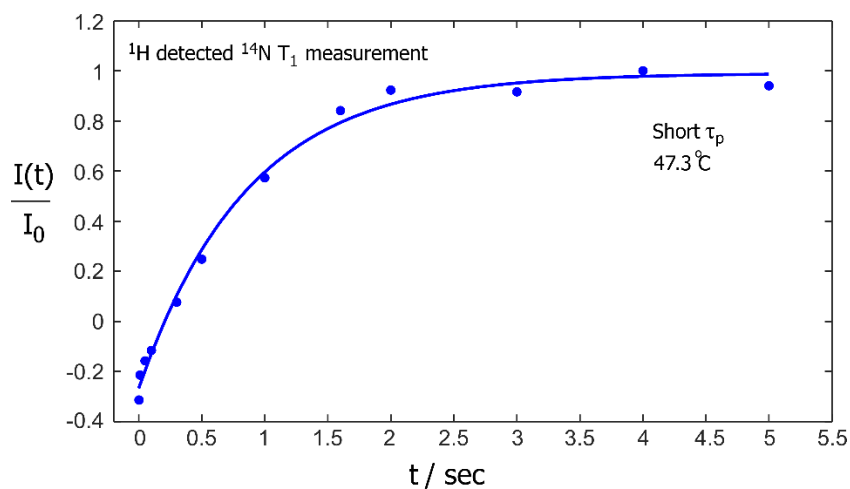

**Figure S2.9:**  $T = -28\text{ }^{\circ}\text{C}$ .  
Fit:  $m = 1.01 \pm 0.08$ ;  $a = 1.0 \pm 0.1$ ;  $T_1 = 223 \pm 85\text{ ms}$ .  
 $\tau_p = 8.3\text{ }\mu\text{s}$ ; recycle delay = 9.6 s; 768 scans.  $t_{\text{exp}} = 15.99\text{ hrs}$ .

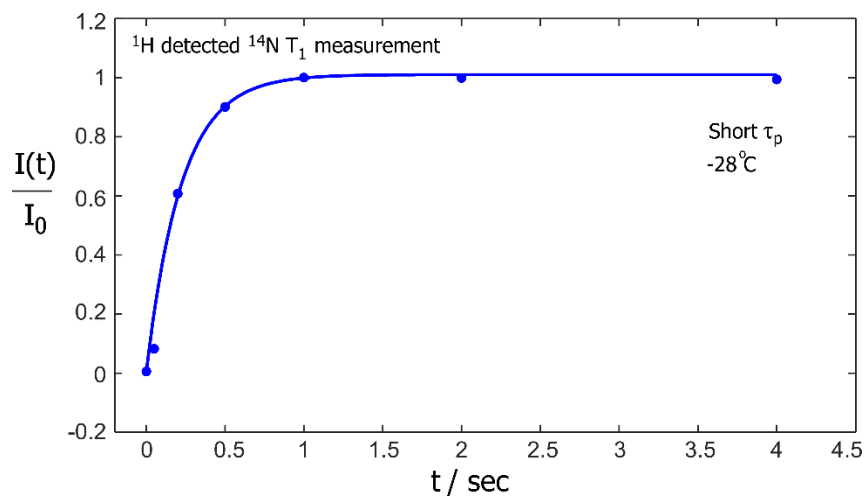

## SUPPORTING INFORMATION

### 3. Direct-excitation $^{81}\text{Br}$ spectrum and phase-modulated $T_1$ saturation recovery curve.

**Figure S3.1:** Single excitation pulse spectrum of  $^{81}\text{Br}$  in TBAB, Tetra-n-butylammonium bromide. The spectrum was acquired with an excitation pulse of 2.4  $\mu\text{s}$ , rf power level of 51.5 kHz, a spinning speed of 14 kHz, 512 scans, and a recycle delay of 1 s. Proton decoupling of 100 kHz (swf-tppm) was applied. The spectrum was processed with an exponential apodization function with a value of 500 Hz.  $t_{\text{exp}} = 9$  min.

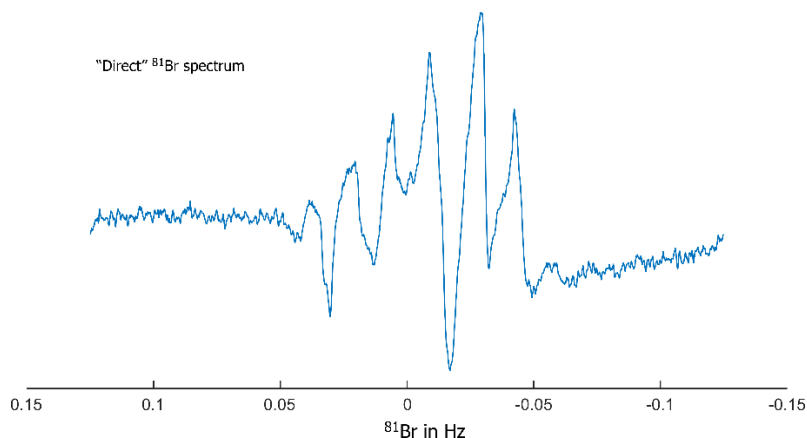

**Figure S3.2:** Direct  $^{81}\text{Br}$ -detected phase-modulated saturation recovery experiment. Each data point was extracted by integrating the directly-detected spectrum. The saturation recovery sequence is given in [1] and the PM pulse lasted 10 rotor periods. The spinning speed was 14 kHz. The  $T_1$  relaxation time is  $13 \pm 1$  ms.  $t_{\text{exp}} = 2.9$  hrs.

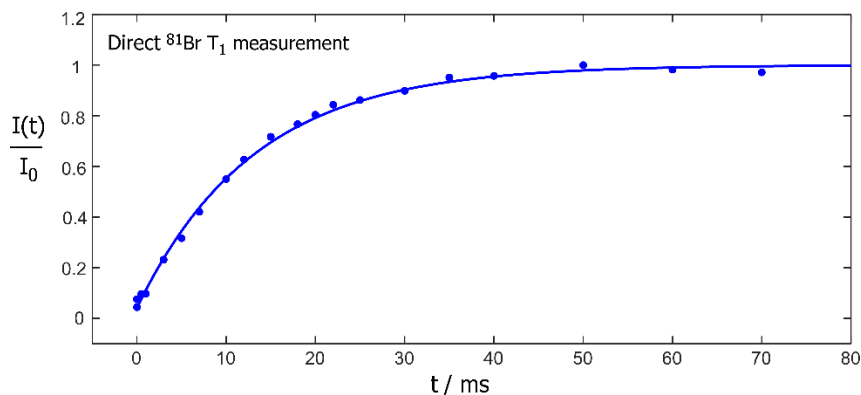

### 4. References

- [1] M. Makrinich, R. Gupta, T. Polenova, A. Goldbourt, Saturation capability of short phase modulated pulses facilitates the measurement of longitudinal relaxation times of quadrupolar nuclei, *Solid State Nucl. Magn. Reson.* 84 (2017) 196-203.
